# Supplementary material
Source: PubMed Central journal article supplement (PMC10270953)
Supplement: S1368980016000069sup001.pdf [file S1368980016000069sup001.pdf]

Supplemental Table 1. Associations of eating frequency, meal frequency, and snack frequency with Healthy Eating Index-2010 and its component intake in acceptable reporters: NHANES 2003-2012\*

(Mean values and standard deviations, or regression coefficients with their standard errors)

|                                               | Mean  | SE    | EF (times/d) |       |         | MF <sub>energy%</sub> (times/d)† |       |        | SF <sub>energy%</sub> (times/d)† |       |         | MF <sub>self-report</sub> (times/d)‡ |       |         | SF <sub>self-report</sub> (times/d)‡ |       |         | MF <sub>time</sub> (times/d)§ |       |         | SF <sub>time</sub> (times/d)§ |       |         |
|-----------------------------------------------|-------|-------|--------------|-------|---------|----------------------------------|-------|--------|----------------------------------|-------|---------|--------------------------------------|-------|---------|--------------------------------------|-------|---------|-------------------------------|-------|---------|-------------------------------|-------|---------|
|                                               |       |       | β            | SE    | P       | β                                | SE    | P      | β                                | SE    | P       | β                                    | SE    | P       | β                                    | SE    | P       | β                             | SE    | P       | β                             | SE    | P       |
| Children aged 6-11 y (n 3425)                 |       |       |              |       |         |                                  |       |        |                                  |       |         |                                      |       |         |                                      |       |         |                               |       |         |                               |       |         |
| HEI-2010                                      | 47.2  | 0.37  | 1.23         | 0.28  | <0.0001 | 1.43                             | 0.59  | 0.02   | 0.69                             | 0.23  | 0.003   | 3.44                                 | 0.65  | <0.0001 | 0.67                                 | 0.29  | 0.02    | 1.79                          | 0.39  | <0.0001 | 0.08                          | 0.30  | 0.79    |
| Total fruit (cup eq/4184 kJ)                  | 0.61  | 0.02  | 0.09         | 0.01  | <0.0001 | 0.06                             | 0.02  | 0.02   | 0.06                             | 0.01  | <0.0001 | 0.11                                 | 0.03  | 0.0007  | 0.07                                 | 0.02  | <0.0001 | 0.10                          | 0.02  | <0.0001 | 0.03                          | 0.02  | 0.10    |
| Whole fruit (cup eq/4184 kJ)                  | 0.34  | 0.01  | 0.05         | 0.01  | <0.0001 | 0.03                             | 0.02  | 0.14   | 0.03                             | 0.01  | 0.0004  | 0.06                                 | 0.02  | 0.003   | 0.04                                 | 0.01  | 0.0005  | 0.06                          | 0.01  | <0.0001 | 0.01                          | 0.01  | 0.20    |
| Total vegetables (cup eq/4184 kJ)             | 0.51  | 0.01  | -0.03        | 0.01  | 0.015   | -0.03                            | 0.02  | 0.18   | -0.02                            | 0.01  | 0.10    | 0.02                                 | 0.02  | 0.40    | -0.03                                | 0.01  | 0.004   | -0.01                         | 0.01  | 0.33    | -0.02                         | 0.01  | 0.04    |
| Greens and beans (cup eq/4184 kJ)             | 0.042 | 0.003 | -0.001       | 0.003 | 0.72    | 0.001                            | 0.005 | 0.90   | -0.001                           | 0.003 | 0.75    | 0.005                                | 0.007 | 0.51    | -0.002                               | 0.003 | 0.54    | 0.000                         | 0.003 | 1.00    | -0.001                        | 0.003 | 0.76    |
| Whole grains (oz eq/4184 kJ)                  | 0.35  | 0.01  | 0.03         | 0.01  | 0.02    | 0.10                             | 0.03  | 0.0002 | 0.000                            | 0.012 | 0.99    | 0.08                                 | 0.02  | <0.0001 | 0.01                                 | 0.01  | 0.24    | 0.06                          | 0.01  | <0.0001 | -0.010                        | 0.010 | 0.24    |
| Dairy (cup eq/4184 kJ)                        | 1.18  | 0.02  | 0.03         | 0.02  | 0.06    | 0.05                             | 0.03  | 0.11   | 0.01                             | 0.01  | 0.32    | 0.16                                 | 0.03  | <0.0001 | 0.002                                | 0.015 | 0.90    | 0.02                          | 0.02  | 0.49    | 0.02                          | 0.01  | 0.10    |
| Total protein foods (oz eq/4184 kJ)           | 2.20  | 0.03  | -0.16        | 0.03  | <0.0001 | -0.07                            | 0.06  | 0.25   | -0.12                            | 0.02  | <0.0001 | -0.02                                | 0.06  | 0.73    | -0.16                                | 0.03  | <0.0001 | -0.13                         | 0.04  | 0.006   | -0.10                         | 0.03  | 0.002   |
| Seafood and plant proteins<br>(oz eq/4184 kJ) | 0.41  | 0.03  | -0.05        | 0.03  | 0.09    | -0.01                            | 0.06  | 0.83   | -0.04                            | 0.02  | 0.06    | 0.03                                 | 0.03  | 0.26    | -0.06                                | 0.03  | 0.08    | -0.06                         | 0.04  | 0.17    | -0.02                         | 0.02  | 0.41    |
| Fatty acids¶                                  | 1.70  | 0.01  | -0.03        | 0.01  | 0.02    | -0.03                            | 0.02  | 0.15   | -0.02                            | 0.01  | 0.07    | -0.09                                | 0.03  | 0.003   | -0.02                                | 0.01  | 0.22    | -0.03                         | 0.01  | 0.07    | -0.02                         | 0.01  | 0.17    |
| Refined grains (oz eq/4184 kJ)                | 3.09  | 0.03  | -0.09        | 0.03  | 0.003   | -0.001                           | 0.061 | 0.98   | -0.08                            | 0.03  | 0.0098  | 0.04                                 | 0.06  | 0.53    | -0.10                                | 0.03  | 0.003   | -0.05                         | 0.03  | 0.11    | -0.07                         | 0.03  | 0.02    |
| Sodium (g/4184 kJ)                            | 1.56  | 0.01  | -0.07        | 0.01  | <0.0001 | -0.03                            | 0.02  | 0.09   | -0.05                            | 0.01  | <0.0001 | 0.01                                 | 0.02  | 0.54    | -0.07                                | 0.01  | <0.0001 | -0.05                         | 0.01  | 0.0002  | -0.05                         | 0.01  | <0.0001 |
| Empty calories (% of energy)**                | 33.6  | 0.2   | 0.11         | 0.22  | 0.61    | -0.34                            | 0.44  | 0.44   | 0.17                             | 0.19  | 0.37    | -2.96                                | 0.54  | <0.0001 | 0.66                                 | 0.21  | 0.003   | -0.79                         | 0.30  | 0.012   | 0.79                          | 0.24  | 0.002   |
| Adolescents aged 12-19 y (n 3752)             |       |       |              |       |         |                                  |       |        |                                  |       |         |                                      |       |         |                                      |       |         |                               |       |         |                               |       |         |
| HEI-2010                                      | 43.9  | 0.33  | 1.37         | 0.24  | <0.0001 | 1.28                             | 0.44  | 0.005  | 0.93                             | 0.24  | 0.0003  | 3.39                                 | 0.51  | <0.0001 | 0.42                                 | 0.26  | 0.11    | 1.74                          | 0.27  | <0.0001 | 0.11                          | 0.31  | 0.73    |
| Total fruit (cup eq/4184 kJ)                  | 0.43  | 0.02  | 0.06         | 0.01  | <0.0001 | 0.04                             | 0.02  | 0.05   | 0.05                             | 0.01  | <0.0001 | 0.11                                 | 0.02  | <0.0001 | 0.03                                 | 0.01  | 0.002   | 0.07                          | 0.01  | <0.0001 | 0.02                          | 0.01  | 0.18    |
| Whole fruit (cup eq/4184 kJ)                  | 0.19  | 0.01  | 0.03         | 0.01  | <0.0001 | 0.01                             | 0.01  | 0.21   | 0.03                             | 0.01  | <0.0001 | 0.06                                 | 0.01  | <0.0001 | 0.02                                 | 0.01  | 0.002   | 0.04                          | 0.01  | <0.0001 | 0.01                          | 0.01  | 0.14    |
| Total vegetables (cup eq/4184 kJ)             | 0.56  | 0.01  | -0.03        | 0.01  | 0.0102  | -0.06                            | 0.02  | 0.002  | -0.01                            | 0.01  | 0.29    | -0.003                               | 0.017 | 0.87    | -0.03                                | 0.01  | 0.006   | -0.02                         | 0.01  | 0.03    | -0.02                         | 0.01  | 0.08    |
| Greens and beans (cup eq/4184 kJ)             | 0.042 | 0.003 | -0.001       | 0.003 | 0.60    | -0.004                           | 0.005 | 0.42   | 0.000                            | 0.003 | 0.96    | 0.005                                | 0.005 | 0.28    | -0.003                               | 0.002 | 0.23    | 0.000                         | 0.002 | 0.87    | -0.001                        | 0.003 | 0.64    |
| Whole grains (oz eq/4184 kJ)                  | 0.29  | 0.01  | 0.04         | 0.01  | <0.0001 | 0.04                             | 0.02  | 0.03   | 0.03                             | 0.01  | 0.004   | 0.07                                 | 0.02  | 0.0005  | 0.02                                 | 0.01  | 0.03    | 0.03                          | 0.01  | 0.02    | 0.03                          | 0.01  | 0.03    |
| Dairy (cup eq/4184 kJ)                        | 1.02  | 0.02  | 0.01         | 0.02  | 0.39    | 0.10                             | 0.03  | 0.002  | -0.02                            | 0.01  | 0.31    | 0.16                                 | 0.03  | <0.0001 | -0.03                                | 0.02  | 0.04    | 0.06                          | 0.02  | 0.002   | -0.03                         | 0.02  | 0.05    |
| Total protein foods (oz eq/4184 kJ)           | 2.43  | 0.05  | -0.14        | 0.03  | <0.0001 | -0.12                            | 0.06  | 0.05   | -0.09                            | 0.03  | 0.003   | 0.02                                 | 0.07  | 0.75    | -0.15                                | 0.03  | <0.0001 | -0.10                         | 0.04  | 0.006   | -0.08                         | 0.03  | 0.03    |
| Seafood and plant proteins<br>(oz eq/4184 kJ) | 0.39  | 0.02  | 0.04         | 0.02  | 0.02    | 0.07                             | 0.04  | 0.07   | 0.02                             | 0.01  | 0.21    | 0.04                                 | 0.04  | 0.34    | 0.03                                 | 0.02  | 0.14    | 0.03                          | 0.02  | 0.05    | 0.02                          | 0.02  | 0.34    |

Supplemental Table 1. Continued

|                                | Mean | SE   | EF (times/d) |      |         | MF <sub>energy%</sub> (times/d)† |      |       | SF <sub>energy%</sub> (times/d)† |       |         | MF <sub>self-report</sub> (times/d)‡ |      |         | SF <sub>self-report</sub> (times/d)‡ |      |         | MF <sub>time</sub> (times/d)§ |      |      | SF <sub>time</sub> (times/d)§ |      |         |
|--------------------------------|------|------|--------------|------|---------|----------------------------------|------|-------|----------------------------------|-------|---------|--------------------------------------|------|---------|--------------------------------------|------|---------|-------------------------------|------|------|-------------------------------|------|---------|
|                                |      |      | β            | SE   | P       | β                                | SE   | P     | β                                | SE    | P       | β                                    | SE   | P       | β                                    | SE   | P       | β                             | SE   | P    | β                             | SE   | P       |
| Fatty acids¶                   | 1.77 | 0.02 | -0.02        | 0.01 | 0.07    | -0.07                            | 0.03 | 0.006 | -0.001                           | 0.012 | 0.95    | -0.11                                | 0.03 | <0.0001 | 0.01                                 | 0.01 | 0.44    | -0.02                         | 0.02 | 0.22 | -0.01                         | 0.02 | 0.52    |
| Refined grains (oz eq/4184 kJ) | 3.17 | 0.03 | -0.07        | 0.03 | 0.005   | -0.07                            | 0.06 | 0.27  | -0.05                            | 0.03  | 0.06    | 0.11                                 | 0.05 | 0.04    | -0.11                                | 0.03 | 0.0002  | -0.03                         | 0.03 | 0.35 | -0.07                         | 0.03 | 0.04    |
| Sodium (g/4184 kJ)             | 1.63 | 0.01 | -0.06        | 0.01 | <0.0001 | -0.06                            | 0.02 | 0.005 | -0.04                            | 0.01  | <0.0001 | 0.01                                 | 0.02 | 0.47    | -0.07                                | 0.01 | <0.0001 | -0.03                         | 0.01 | 0.02 | -0.05                         | 0.01 | <0.0001 |
| Empty calories (% of energy)** | 34.1 | 0.3  | 0.40         | 0.17 | 0.02    | 0.34                             | 0.46 | 0.46  | 0.28                             | 0.16  | 0.08    | -2.73                                | 0.44 | <0.0001 | 1.22                                 | 0.17 | <0.0001 | -0.37                         | 0.25 | 0.15 | 0.83                          | 0.23 | 0.0006  |

NHANES, National Health and Nutrition Examination Survey; EF, eating frequency; MF<sub>energy%</sub>, meal frequency (MF) determined based on percentage contribution to total energy intake; SF<sub>energy%</sub>, snack frequency (SF) determined based on percentage contribution to total energy intake; MF<sub>self-report</sub>, MF determined based on self-report; SF<sub>self-report</sub>, SF determined based on self-report; MF<sub>time</sub>, MF determined based on the time consumed; SF<sub>time</sub>, SF determined based on the time consumed; HEI-2010, Healthy Eating Index-2010; eq, equivalent.

\* Analyses are based on subjects with the ratio of energy intake to estimated energy requirement (EI:EER) 0.69 to 1.46 (i.e., acceptable reporters). Subjects with EI:EER <0.69 (i.e., under-reporters; *n* 447 in children and 2115 in adolescents) and those with EI:EER >1.46 (i.e., over-reporters; *n* 397 in children and 326 in adolescents) were excluded from the analyses. All dietary variables are based on average values of two 24-h dietary recalls. Adjustment was made for sex (boys or girls), age (y, continuous), race/ethnicity (non-Hispanic white, non-Hispanic black, Mexican American, or others), family poverty income ratio (< 130%, 130%-349%, or ≥ 350%), education of household head (< 12 y, 12 y, some college, or college degree or more), household size (≤ 2, 3-4, or ≥ 5), physical activity (low, moderate, or active), watching television and computer use (< 2, ≥ 2 to < 4, ≥ 4 to < 6, or ≥ 6 h/d), weight status (underweight, normal overweight, or obese), and survey cycle (2003-2004, 2005-2006, 2007-2008, 2009-2010, or 2011-2012).

† A meal was defined as any eating episode comprising ≥ 15% of total energy intake, regardless of the time of day or composition of foods and beverages consumed; all other eating episodes were classified as snacks.

‡ Self-reports of breakfast, brunch, lunch, supper, and dinner or their equivalents in Spanish were considered meals; all other self-reported eating events were considered as snacks.

§ Meals were defined as eating events reported during select times of the day (0600-0900, 1200-1400, and 1700-2000 hours); all other eating occasions were considered snacks.

|| Regression coefficients mean the change of dietary variables with one additional eating occasion per day.

¶ Ratio of PUFA and MUFA to SFA.

\*\* Energy from solid fats, alcohol, and added sugars.
